# Supplementary material for: Three-step method with self-sacrificial Co to prepare a uniform 5 nm-scale Pt catalyst for the oxygen reduction reaction
Source: Royal Society of Chemistry journal article supplement (doi:10.1039/d1nj01780b), 2021-01-01
Supplement: d1nj01780b1.pdf [file d1nj01780b1.pdf]

## Supporting Information:

### Three-steps method with self-sacrificial Co to prepare uniform 5 nm-scale Pt catalyst for the oxygen reduction reaction

Donggang Li<sup>\*a</sup>, Yanlong Gong<sup>a</sup>, Gen Li<sup>b</sup>, Xiao Lyu<sup>\*b</sup>, Zhenqing Dai<sup>c</sup>, and Qiang Wang<sup>d</sup>

<sup>a</sup> School of Metallurgy, Northeastern University, Shenyang 110004, PR China

<sup>b</sup> School of Materials Science and Engineering, Shenyang Ligong University, Shenyang, 110159, PR China

<sup>c</sup> College of Sciences, Northeastern University, Shenyang 110004, PR China

<sup>d</sup> Key Laboratory of Electromagnetic Processing of Materials, Northeastern University, Shenyang 110004, PR China

\*Corresponding author E-mail: [lidonggang@smm.neu.edu.cn](mailto:lidonggang@smm.neu.edu.cn), [lyux@sylu.edu.cn](mailto:lyux@sylu.edu.cn)

## Table of Contents

**Fig. S1:** SEM images of (a) CMK-3 and (b) CMK-3-D.

**Fig. S2:** EDS elemental mapping results for CoPt/CMK-3-D catalyst.

**Fig. S3:** EDX mapping result for CoPt/CMK-3-D catalyst.

**Fig. S4:** LSV curves of the CMK-3 and CMK-3-D.

**Fig. S5:** LSV curves of CoPt/CMK-3-D catalyst synthesized with different time by the pulse electrodeposition.

**Fig. S6:** (a) CV curves and (b) ECSA of CoPt/CMK-3-D catalyst before and after stability test.

**Fig. S7:** (a) Performance comparison of LSV for Pt/CMK-3-D catalysts after accelerated durability test. (b) Comparisons of MA and SA of Pt/CMK-3-D before and after accelerated durability test.

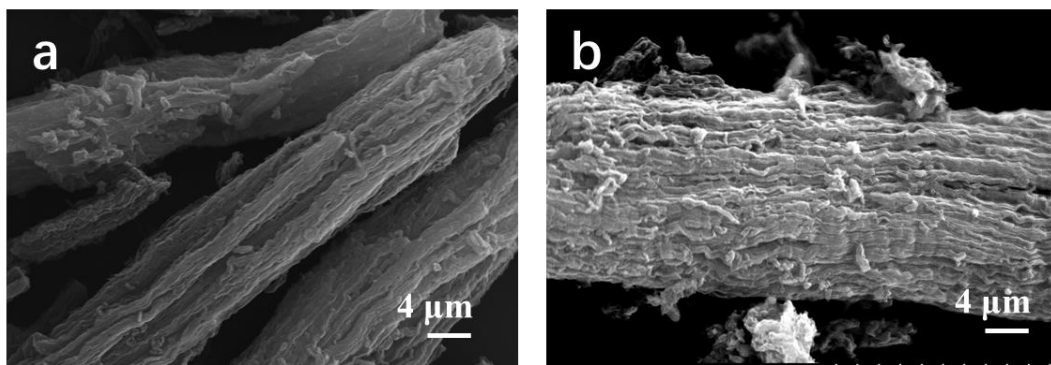

**Fig. S1.** SEM images of (a) CMK-3 and (b) CMK-3-D.

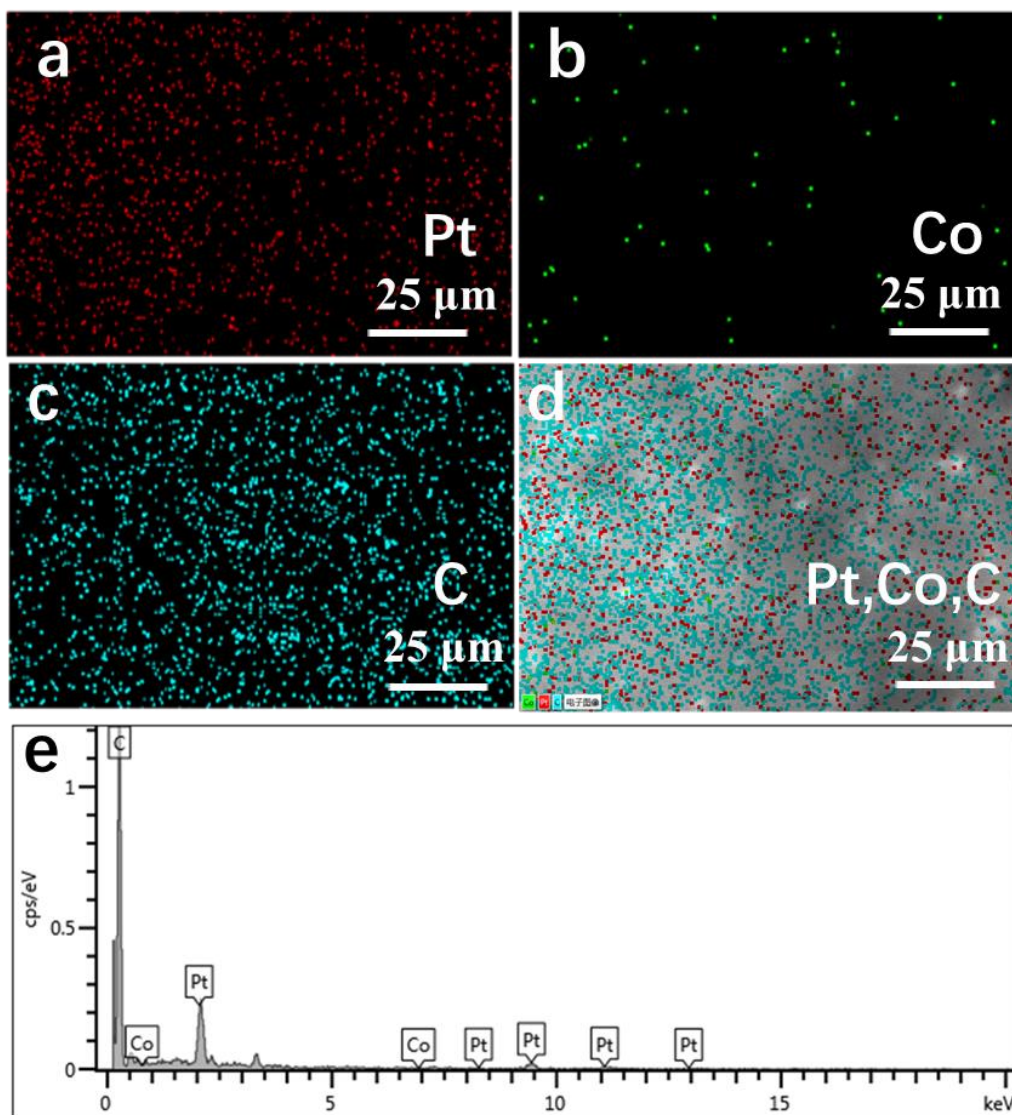

**Fig. S2.** EDS elemental mapping results for CoPt/CMK-3-D catalyst.

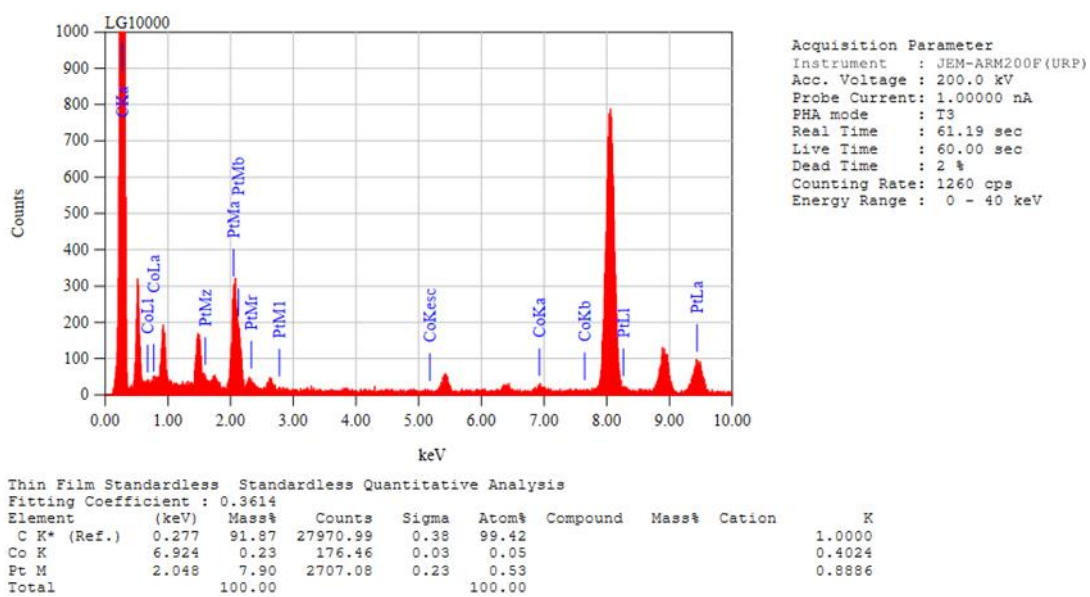

**Fig. S3.** EDX mapping result for CoPt/CMK-3-D catalyst.

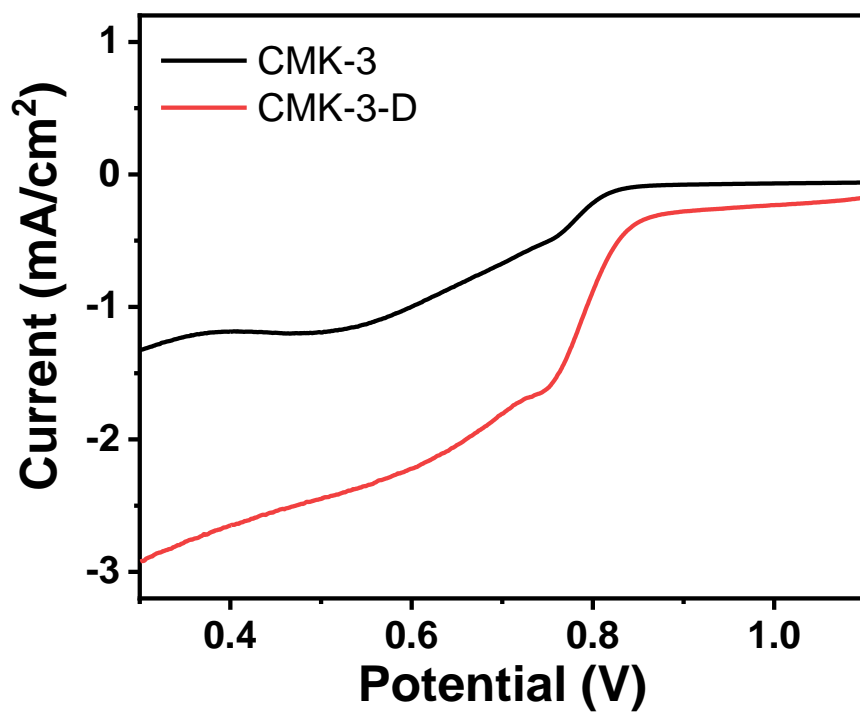

**Fig. S4.** LSV curves of the CMK-3 and CMK-3-D.

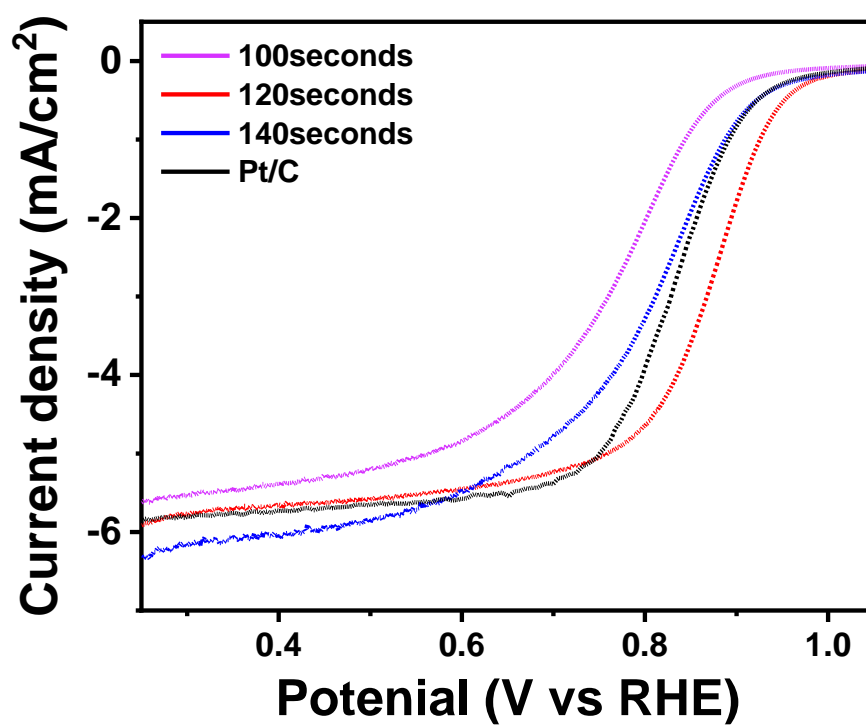

**Fig. S5.** LSV curves of CoPt/CMK-3-D catalyst synthesized with different time by the pulse electrodeposition.

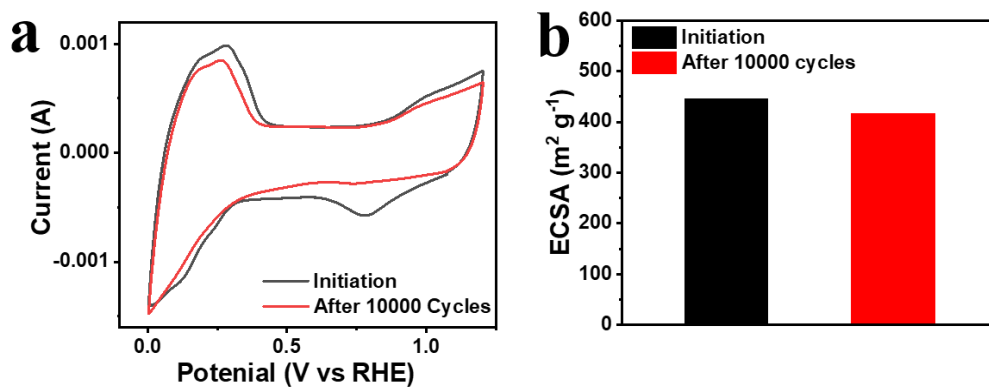

**Fig. S6.** (a) CV curves and (b) ECSA of CoPt/CMK-3-D catalyst before and after stability test.

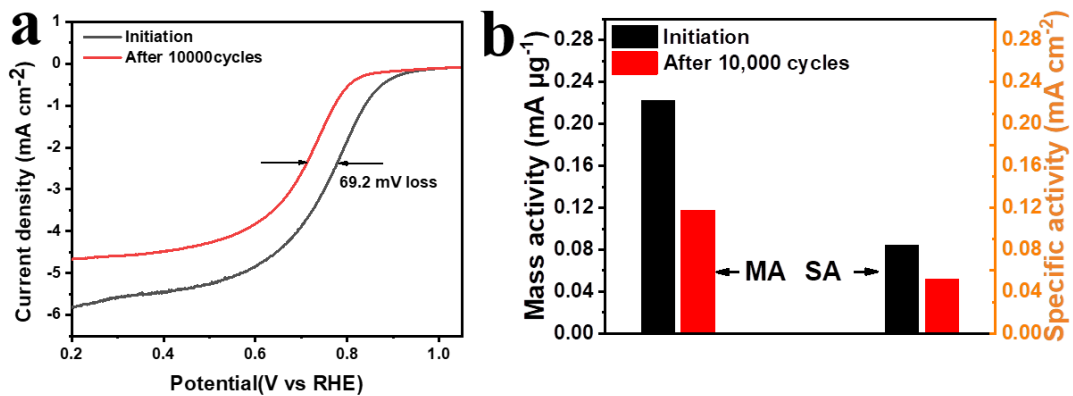

**Fig. S7.** (a) Performance comparison of LSV for Pt/CMK-3-D catalysts after accelerated durability test. (b) Comparisons of MA and SA of Pt/CMK-3-D before and after accelerated durability test.
